# Supplementary material for: Abnormal dendritic calcium activity and synaptic depotentiation occur early in a mouse model of Alzheimer’s disease
Source: Springer Nature journal article supplement (doi:10.1186/s13024-017-0228-2), 2017-11-14

**a**

Quiet resting

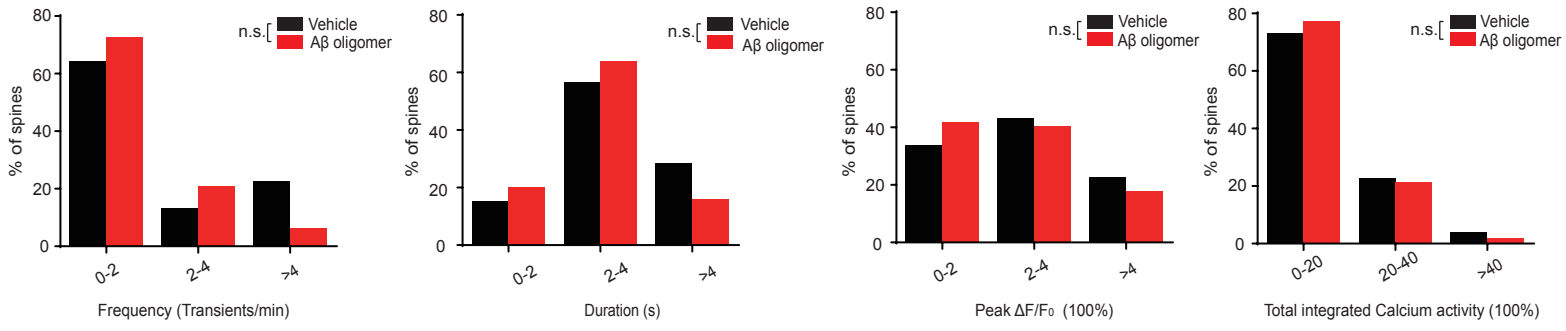**b**

Running

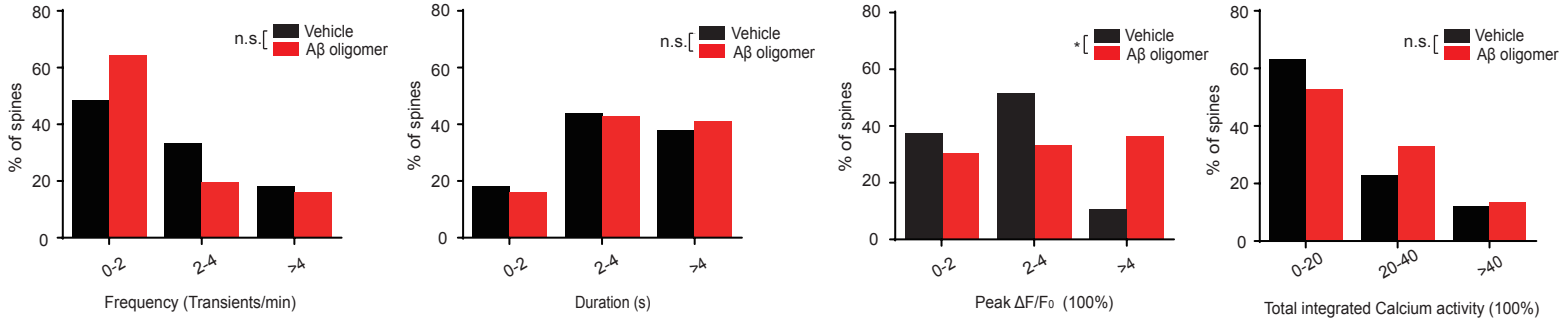

Supplement: MOESM2 [file 15223960]
